# Supplementary material for: Incorporating the Cluster A and V1V2 Targets into a Minimal Structural Unit of the HIV-1 Envelope to Elicit a Cross-Clade Response with Potent Fc-Effector Functions
Source: MDPI journal article supplement (doi:10.3390/vaccines9090975), 2021-08-31
Supplement: s1 [file s1]

**Figure S1** (A) Full length clade A/E 93TH057 gp120 amino acid sequence with regions used to make ID2-V1V2 colored in blue with the V1V2 loop in green. Residues Val<sup>65</sup> and Ser<sup>115</sup> which are mutated to cysteine in ID2-V1V2 to make a stabilizing disulfide bond are highlighted in red. (B) The amino acid sequence of clade A/E 93TH057 ID2-V1V2 colored as in (A). The Gly-Gly linker that replaces the gp120 outer domain and the ID2-V1V2 stabilizing disulfide bond are colored in red. (C) The codon optimized DNA sequence of clade A/E 93TH057 ID2-V1V2.

**Figure S2.** Sub-cutaneous immunization analysis. Sera from mice immunized subcutaneously with ID2 or ID2-V1V2 was analyzed for ADCC against (A) gp120 core coated target cells and (B) Bal gp120 coated target cells. (C) CH59 competition ELISA (D) sera binding to wild type and Nef-VPU- ADA virally infected cells. (E) ADCC against wild type and Nef-VPU- ADA virally infected cells.
