# Supplementary material for: Incorporating the Cluster A and V1V2 Targets into a Minimal Structural Unit of the HIV-1 Envelope to Elicit a Cross-Clade Response with Potent Fc-Effector Functions
Source: Vaccines (Basel). 2021 Aug 31;9(9):975. doi: 10.3390/vaccines9090975 (PMC8472903; doi:10.3390/vaccines9090975)
Supplement: Supplementary file 1 [file vaccines-09-00975-s001.zip]

Archive with 4 entries (4 files):
- Figure S1.JPG
- Figure S2.JPG
- Sup. Figure legends.pdf
- Supplementary Materials and Methods.pdf
